# Supplementary material for: Evaluation and Selection of Interspecific Lines of Groundnut (Arachis hypogaea L.) for Resistance to Leaf Spot Disease and for Yield Improvement
Source: MDPI journal article supplement (doi:10.3390/plants10050873), 2021-04-26
Supplement: s1 [file s1]

**Supplementary Table 1.** Analysis of variance for traits in Tables 1-5.

Trait: AUDPC for early leafspot for Table 1.

| Source                 | SS        | df  | MS        | F      | P       |
|------------------------|-----------|-----|-----------|--------|---------|
| Environment            | 2,056,400 | 3   | 685,468.3 | 361.04 | <0.0001 |
| Rep (Environment)      | 15,189    | 8   | 1,898.6   | 5.94   | <0.0001 |
| Genotype               | 37,139    | 29  | 1,280.7   | 2.10   | 0.0044  |
| Environment x Genotype | 53,085    | 87  | 610.2     | 1.91   | 0.0001  |
| Error                  | 71,009    | 222 | 319.9     |        |         |

Trait: AUDPC for early leafspot for Table 2.

| Source                 | SS        | df  | MS        | F      | P       |
|------------------------|-----------|-----|-----------|--------|---------|
| Environment            | 1,351,970 | 3   | 450,658.3 | 266.26 | <0.0001 |
| Rep (Environment)      | 13,540    | 8   | 1,692.5   | 5.69   | <0.0001 |
| Genotype               | 29,286    | 29  | 1,009.9   | 1.43   | 0.1024  |
| Environment x Genotype | 61,254    | 87  | 704.1     | 2.37   | <0.0001 |
| Error                  | 66,068    | 222 | 297.6     |        |         |

Trait: Time to appearance of symptoms for early leafspot for Table 3.

| Source                 | SS     | df  | MS       | F       | P       |
|------------------------|--------|-----|----------|---------|---------|
| Environment            | 10,940 | 2   | 5,470.09 | 1169.10 | <0.0001 |
| Rep (Environment)      | 28     | 6   | 4.68     | 1.54    | 0.1667  |
| Genotype               | 517    | 30  | 17.23    | 2.81    | 0.0003  |
| Environment x Genotype | 367    | 60  | 6.12     | 2.02    | 0.0002  |
| Error                  | 531    | 175 | 3.03     |         |         |

Trait: Time to appearance of symptoms for late leafspot for Table 4.

| Source                 | SS    | df | MS     | F     | P       |
|------------------------|-------|----|--------|-------|---------|
| Environment            | 17.1  | 1  | 17.13  | 0.12  | 0.7493  |
| Rep (Environment)      | 419.1 | 3  | 139.69 | 35.71 | <0.0001 |
| Genotype               | 921.9 | 30 | 30.73  | 31.94 | <0.0001 |
| Environment x Genotype | 28.9  | 30 | 0.96   | 0.25  | >0.9999 |
| Error                  | 352.0 | 90 | 3.91   |       |         |

Trait: Pod yield for Table 5.

| Source                 | SS          | df  | MS         | F     | P       |
|------------------------|-------------|-----|------------|-------|---------|
| Environment            | 116,617,000 | 3   | 38,872,400 | 17.21 | 0.0008  |
| Rep (Environment)      | 18,070,100  | 8   | 2,258,770  | 8.30  | <0.0001 |
| Genotype               | 41,724,200  | 28  | 1,490,150  | 3.85  | <0.0001 |
| Environment x Genotype | 32,515,100  | 84  | 387,085    | 1.42  | 0.0221  |
| Error                  | 59,598,700  | 219 | 272,140    |       |         |
